# Supplementary material
Source: publisher figshare collection journal article supplement (https://sage.figshare.com/ndownloader/files/17771273)
Supplement: Supplementary file 1 [file 17771273]

## Appendix B: Supplemental Analyses

**Supplementary Table 1: General linear regression model estimates of the influence of item characteristics on acquiescence, full study sample ( $n=90$  items)**

| <i>Dependent Variable: Mean Acquiescence</i>              | <b>(<math>n=400</math>)</b><br><b><i>B (SE)</i></b> | <b>(<math>n=400</math>)</b><br><b><i>B (SE)</i></b> |
|-----------------------------------------------------------|-----------------------------------------------------|-----------------------------------------------------|
| Qualified wording                                         | -0.14 (.14)                                         |                                                     |
| Mental comparisons                                        | -0.01 (.19)                                         |                                                     |
| Negated wording                                           | -0.36 (.16)*                                        |                                                     |
| Unfamiliar terms                                          | 0.11 (.14)                                          |                                                     |
| Ambiguous terms                                           | -0.28 (.13)*                                        |                                                     |
| Knowledge accessibility (no knowledge accessibility = 0): |                                                     |                                                     |
| Low knowledge accessibility                               | -0.11 (.31)                                         |                                                     |
| Moderate knowledge accessibility                          | 0.03 (.26)                                          |                                                     |
| High knowledge accessibility                              | 0.34 (.25)                                          |                                                     |
| Number of problem characteristics (0=ref):                |                                                     |                                                     |
| 1 problem characteristic                                  |                                                     | -0.62 (.30)*                                        |
| 2 problem characteristics                                 |                                                     | -0.71 (.29)*                                        |
| 3–4 problem characteristics                               |                                                     | -0.88 (.30)**                                       |
| $R^2$                                                     | .18                                                 | .10                                                 |
| Model $p$ -value                                          | .04                                                 | .04                                                 |

# =  $p < .10$ ; \* =  $p < .05$ ; \*\* =  $p < .01$ ; \*\*\* =  $p < .001$ ; \*\*\*\* =  $p < .0001$

**Supplementary Table 2: General linear regression model estimates of the influence of item characteristics on acquiescence by education (n=90 items)**

| <i>Dependent Variable: Mean Acquiescence</i>              | <b>High School or Less<br/>(n=193)<br/><i>B (SE)</i></b> | <b>More than High School<br/>(n=198)<br/><i>B (SE)</i></b> |
|-----------------------------------------------------------|----------------------------------------------------------|------------------------------------------------------------|
| Qualified wording                                         | -0.14 (.13)                                              | -0.14 (.16)                                                |
| Mental comparisons                                        | 0.04 (.18)                                               | -0.05 (.21)                                                |
| Negated wording                                           | -0.32 (.15)*                                             | -0.41 (.17)*                                               |
| Unfamiliar terms                                          | 0.09 (.14)                                               | 0.13 (.16)                                                 |
| Ambiguous terms                                           | -0.24 (.12) <sup>#</sup>                                 | -0.33 (.15)*                                               |
| Knowledge accessibility (no knowledge accessibility = 0): |                                                          |                                                            |
| Low knowledge accessibility                               | -0.10 (.29)                                              | -0.10 (.34)                                                |
| Moderate knowledge accessibility                          | -0.03 (.24)                                              | 0.11 (.29)                                                 |
| High knowledge accessibility                              | 0.25 (.24)                                               | 0.45 (.28)                                                 |
| $R^2$                                                     | .16                                                      | .19                                                        |
| Model $p$ -value                                          | .07                                                      | .03                                                        |

<sup>#</sup> =  $p < .10$ ; \* =  $p < .05$ ; \*\* =  $p < .01$ ; \*\*\* =  $p < .001$ ; \*\*\*\* =  $p < .0001$

**Supplementary Table3: General linear regression model estimates of the influence of item characteristics on acquiescence by age ( $n=90$  items)**

| <i>Dependent Variable: Mean Acquiescence</i>              | <b>Ages 18–50<br/>(<math>n=190</math>)<br/><i>B (SE)</i></b> | <b>Ages 51–90<br/>(<math>n=211</math>)<br/><i>B (SE)</i></b> |
|-----------------------------------------------------------|--------------------------------------------------------------|--------------------------------------------------------------|
| Qualified wording                                         | -0.16 (.15)                                                  | -0.12 (.14)                                                  |
| Mental comparisons                                        | -0.04 (.19)                                                  | -0.03 (.19)                                                  |
| Negated wording                                           | -0.38 (.16)*                                                 | -0.35 (.16)*                                                 |
| Unfamiliar terms                                          | 0.11 (.15)                                                   | 0.11 (.15)                                                   |
| Ambiguous terms                                           | -0.30 (.14)*                                                 | -0.27 (.13)*                                                 |
| Knowledge accessibility (no knowledge accessibility = 0): |                                                              |                                                              |
| Low knowledge accessibility                               | -0.10 (.32)                                                  | -0.13 (.31)                                                  |
| Moderate knowledge accessibility                          | 0.14 (.26)                                                   | -0.07 (.26)                                                  |
| High knowledge accessibility                              | 0.47 (.26) <sup>#</sup>                                      | 0.23 (.26)                                                   |
| $R^2$                                                     | .20                                                          | .16                                                          |
| Model $p$ -value                                          | .02                                                          | .07                                                          |

<sup>#</sup> =  $p < .10$ ; \* =  $p < .05$ ; \*\* =  $p < .01$ ; \*\*\* =  $p < .001$ ; \*\*\*\* =  $p < .0001$

**Supplementary Table 4: General linear regression model estimates of the influence of item characteristics on acquiescence by interview language ( $n=90$  items)**

| <i>Dependent Variable: Mean Acquiescence</i>              | <b>English<br/>(<math>n=194</math>)<br/><i>B (SE)</i></b> | <b>Spanish<br/>(<math>n=205</math>)<br/><i>B (SE)</i></b> |
|-----------------------------------------------------------|-----------------------------------------------------------|-----------------------------------------------------------|
| Qualified wording                                         | -0.17 (.15)                                               | -0.11 (.15)                                               |
| Mental comparisons                                        | -0.01 (.21)                                               | -0.09 (.19)                                               |
| Negated wording                                           | -0.44 (.17)*                                              | -0.31 (.16) <sup>#</sup>                                  |
| Unfamiliar terms (English only)                           | 0.11 (.15)                                                |                                                           |
| Ambiguous terms (English only)                            | -0.32 (.15)*                                              |                                                           |
| Knowledge accessibility (no knowledge accessibility = 0): |                                                           |                                                           |
| Low knowledge accessibility                               | -0.05 (.32)                                               | -0.21 (.32)                                               |
| Moderate knowledge accessibility                          | 0.24 (.28)                                                | -0.11 (.27)                                               |
| High knowledge accessibility                              | 0.55 (.28) <sup>#</sup>                                   | 0.13 (.26)                                                |
| Item length                                               | 0.0004 (.02)                                              | -0.01 (.02)                                               |
| Number of polysyllabic words                              | 0.01 (.07)                                                |                                                           |
| $R^2$                                                     | .22                                                       | .11                                                       |
| Model $p$ -value                                          | .03                                                       | .19                                                       |

<sup>#</sup> =  $p < .10$ ; \* =  $p < .05$ ; \*\* =  $p < .01$ ; \*\*\* =  $p < .001$ ; \*\*\*\* =  $p < .0001$

**Supplementary Table 5: General linear regression model estimates of the influence of item characteristics on acquiescence by gender ( $n=90$  items)**

| <i>Dependent Variable: Mean Acquiescence</i>              | <b>Male<br/>(<math>n=122</math>)<br/><i>B (SE)</i></b> | <b>Female<br/>(<math>n=278</math>)<br/><i>B (SE)</i></b> |
|-----------------------------------------------------------|--------------------------------------------------------|----------------------------------------------------------|
| Qualified wording                                         | -0.18 (.14)                                            | -0.12 (.15)                                              |
| Mental comparisons                                        | -0.04 (.18)                                            | 0.01 (.19)                                               |
| Negated wording                                           | -0.39 (.15)*                                           | -0.35 (.16)*                                             |
| Unfamiliar terms                                          | 0.11 (.14)                                             | 0.11 (.15)                                               |
| Ambiguous terms                                           | -0.28 (.13)*                                           | -0.29 (.14)*                                             |
| Knowledge accessibility (no knowledge accessibility = 0): |                                                        |                                                          |
| Low knowledge accessibility                               | -0.14 (.30)                                            | -0.10 (.32)                                              |
| Moderate knowledge accessibility                          | 0.09 (.25)                                             | 0.01 (.27)                                               |
| High knowledge accessibility                              | 0.34 (.24)                                             | 0.34 (.26)                                               |
| $R^2$                                                     | .20                                                    | .17                                                      |
| Model $p$ -value                                          | .02                                                    | .05                                                      |

# =  $p < .10$ ; \* =  $p < .05$ ; \*\* =  $p < .01$ ; \*\*\* =  $p < .001$ ; \*\*\*\* =  $p < .0001$

**Supplementary Table 6: Summary of Study Findings**

| <b>Hypothesis</b>                                                                                          | <b>Study Finding</b>                                      |
|------------------------------------------------------------------------------------------------------------|-----------------------------------------------------------|
| H1a. Items that include qualified wording will be associated with higher acquiescence.                     | Hypothesis was not supported                              |
| H1b. Items that include mental comparisons will be associated with higher acquiescence.                    | Hypothesis was not supported                              |
| H1c. Items that include negated wording will be associated with higher acquiescence.                       | Negated wording was associated with lower acquiescence.   |
| H2a. Items that include unfamiliar terms will be associated with higher acquiescence.                      | Hypothesis was not supported                              |
| H2b. Items that include ambiguous wording will be associated with higher acquiescence.                     | Ambiguous wording was associated with lower acquiescence. |
| H2c. Item length will be positively associated with acquiescence.                                          | Hypothesis was not supported                              |
| H2d. Items that include a higher number of polysyllabic words will be associated with higher acquiescence. | Hypothesis was not supported                              |
| H3. Knowledge accessibility will be negatively associated with acquiescence.                               | Hypothesis was not supported                              |
